# Supplementary figures and images for: Two reliable calibration methods for accuratein situU–Pb dating of scheelite
Source: Royal Society of Chemistry journal article supplement (doi:10.1039/d1ja00387a), 2022-01-01

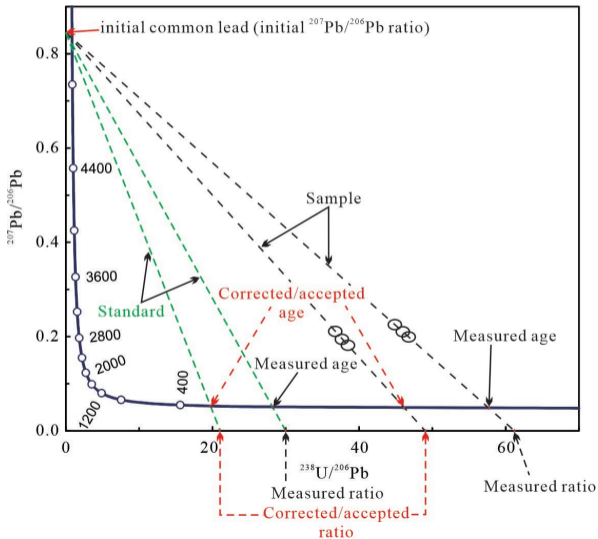

Supplement: d1ja00387a1.pdf [file d1ja00387a1.pdf]
